# Supplementary material for: Effects of classical PKC activation on hippocampal neurogenesis and cognitive performance: mechanism of action
Source: PubMed Central journal article supplement (PMC8115324; doi:10.1038/s41386-020-00934-y), 2020-12-17
Supplement: 41386_2020_934_MOESM1_ESM.pdf [file 41386_2020_934_MOESM1_ESM.pdf]

## Supplementary methods

### (enlarged version of the methodology)

#### Reagents

Isolation and purification of the 12-deoxyphorbol ER272 (CAS:25090-74-8) was performed in our laboratory as previously described [1]. In brief, compound was obtained by isolation and purification from methanolic extracts of the latex from *E. resinifera*. The methanolic fraction was subjected to silica gel column chromatography with an increasing gradient of ethyl acetate in hexane as mobile phase and monitored by TLC. Further semi-preparative and analytical HPLC yielded compounds with spectroscopic (<sup>1</sup>H and <sup>13</sup>C NMR) and spectrometric (HRMS) data consistent with previously described 13-*O*-isobutyryl-12-deoxyphorbol (ER272) [2]. PKC inhibitors were purchased from Sigma-Aldrich (St. Louis, MO) and Calbiochem (Millipore, Billerica, MA). The general inhibitor of PKC bisindolylmaleimide I (Gö6850) and the classical PKC inhibitor (Gö6976) were added to cell cultures at final concentrations of 5 μM and 1 μM, respectively and were added 30 minutes before the addition of the PKC activators. Other products, unless otherwise indicated, were purchased from Sigma-Aldrich (St. Louis, MO, USA).

#### Animals

SVZ derived neural progenitor cells (NPC) were isolated from 7-day postnatal CD1 mice and used for *in vitro* experiments. For *in vivo* experiments 2-month-old male CD1 mice were used. Animals were housed under controlled conditions of temperature (21-23°C) and light (LD 12:12) with free access to food (AO4 standard maintenance diet, SAFE, Épinau-sur-Orge, France) and water. Care and handling of animals were performed according to the Guidelines of the European Union Council (2010/63/EU), and the Spanish regulations (65/2012 and RD53/2013) for the use of laboratory animals. All studies involving animals are reported in accordance with the ARRIVE guidelines for reporting experiments involving animals [3,4]

#### Intranasal administration of ER272

ER272, was delivered intranasally as previously described [5-7]; in brief, treatments were administered manually while the animal was placed in a standing position with an extended neck as previously described [7]. 18 μL of each solution (5 μM ER272 in saline, or saline as vehicle) was delivered over both nasal cavities alternating 3 μL/each using a micropipette. Mouse was maintained in such position for 10 additional seconds to ensure all fluid was inhaled. In all experiments, mice were coded, treatment (vehicle or ER272) was assigned randomly to code numbers and applied. In addition, blind quantifications were performed to avoid subjective biases.

#### ICV administration of ER272

Adult mice were anesthetized and placed on a stereotaxic frame to administrate ER272 (1 μM) or only vehicle as previously described [1,8]. In brief, 2 months old adult male mice were anaesthetized with ketamine/xylazine

and placed on a stereotaxic frame (Kopf Instruments). We made a small trepanation 0.8mm lateral to Bregma, to introduce the needle of a 5- $\mu$ L Hamilton syringe 2.4mm below the brain surface. A solution of ultra-filtered ER272, in PBS (1  $\mu$ M final concentration) (n= 6), or vehicle (n=6), were injected ipsilaterally into the right lateral ventricles. 2  $\mu$ L single injections were give per brain through a time-frame of 10 minutes; afterwards, the Hamilton syringe was left another 5 minutes before removal. Animals received daily injections of bromodeoxyuridine (BrdU) (120mg/kg), during 3 days starting the day of the surgical procedure. Mice were then deeply anaesthetized with pentobarbital and perfused with 4% PFA via ascending aorta. Brains were removed and sliced in 30- $\mu$ m serial sections from Bregma 2.1 to -3.8, where the SVZ and hippocampus are contained.

### **Brain processing and immunohistochemistry**

At the end of the treatment mice were then deeply anaesthetized with pentobarbital and perfused with 4% PFA via ascending aorta; brains were then removed and—sliced using a cryotome into 30  $\mu$ m sections. Immunohistochemistry was performed as previously described [1,8,9]. See antibodies in supplementary tables 1 and 2.

### **Quantification of neurogenesis in brain sections**

Cells positive for BrdU, DCX, GFAP, EGFR, nestin, or Ascl1 in the SVZ and DG were estimated as described [10,11]. Positive cells were counted throughout the entire DG area or lateral and laterodorsal walls of the lateral ventricles in every fifth section; 14-16 sections per brain where analyzed under fluorescence microscopy at 20X magnification. Mice were coded depending on the treatment and quantification of cells in brain slices was done in blinded analysis. Cells in the SVZ and DG of both brain hemispheres have been quantified unless otherwise indicated.

### **SVZ-derived NPC isolation and culture**

SVZ- derived cells were isolate following the same procedure described in Rabaneda et al, 2008 [10]. NPCs were obtained from the SVZ of 7-day postnatal mice following the procedure previously described [10] . Neurosphere cultures were maintained in defined medium (DM) composed of Dulbecco's modified Eagle's medium/F12 medium (1:1vol/vol) plus 1mg/L gentamicin (GIBCO) and the B27 supplement (Invitrogen, Carlsbad, CA). EGF (20ng/mL) and bFGF (10ng/mL; both from PeproTech, Frankfurt, Germany) were added to DM for culture expansion. Growth factors EGF and bFGF were used as indicated in the figure legends

### **Neurosphere assay**

To test the effects of ER272 on NPC proliferation, single cells from mechanically disaggregated neurospheres were plated onto anti-adherent 96-well plates at a density of 20,000 cells/mL in defined medium + 10ng/mL bFGF, 20 ng/mL of EGF or both as indicated in the figure legends. ER272 and other pharmacological agents were added at the time of seeding, and all conditions were run in triplicates. Neurosphere number and size were

measured as previously described [11]. Inhibitors were added 30 minutes before the addition of ER272. Results were obtained from a minimum of 3 independent experiments performed with triplicate samples.

### **Neurosphere treatment and transfection**

Neurosphere cells were transfected with specific siRNA SmartPool One target siRNA from Horizon (Cambridge, UK) against each specific PKC isozyme using Lipofectamine 2000, following the manufacturer's instructions as previously described [8]. ER272 was added and cells were maintained for 48 additional hours before being used for flow cytometry.

### **Flow cytometry**

For proliferation studies, cells were disaggregated from the neurospheres and fixed in 4% PFA rinsed with PBS and centrifuged (300 x g; 5 min). Cells were incubated in a blocking solution (1 mg·mL<sup>-1</sup> bovine serum albumin and 0.3% Triton X100) followed by an incubation with fluorescent antibody (supplementary table S1). Cells were then rinsed in PBS, resuspended in FACS buffer and analyzed in a Attune NxT flow cytometer (Invitrogen).

### **Cloning of human Neuregulin and TGF $\alpha$ cDNA fused to GFP and Cherry**

Full-length cDNA encoding the membrane-bound isoform of human pro-neuregulin-1  $\beta$ 1-type (NRG1, NCBI reference sequence: NP\_039250.2) with mCherry cDNA inserted between nucleotides 93 and 94 of NRG1 open reading frame was cloned into pEGFP-N1 to add EGFP cDNA to the 3' end. Construct was synthesized by GeneCust (Boynes, France) to generate the mCherry-NRG1-GFP construct. The mCherry-TGF $\alpha$ -GFP construct containing the human transforming growth factor alpha (TGFA, NCBI reference sequence: NM\_003236.4), containing mCherry cDNA between nucleotides 126 and 127 of TGFA was built using the same strategy and synthesized by GeneCust (Boynes, France).

### **HEK293T culture and transfection**

HEK293T obtained from ATCC (Manassas, VA, USA) were cultured and transfected as previously described [12]. HEK293T cells were obtained from ATCC (Manassas, VA, USA). They were cultured in DMEM at 37 °C and 5% CO<sub>2</sub> (Thermo Fisher Scientific, Inc., Rockford, IL, USA), supplemented with fetal bovine serum (10%), 1× GlutaMA<sup>TM</sup>-I (Thermo Fisher Scientific, Inc., Rockford, IL, USA) and penicillin/streptomycin (1%). Cells were passaged, seeded and allowed to attach for 24 h. Lipofectamine 2000 (Invitrogen; Carlsbad, CA, USA) was used for transfection of these plasmids. Afterwards, medium was changed to eliminate Lipofectamine. After an overnight incubation, the cells were starved for at least 30 minutes in serum-free Fluorobrite DMEM (Thermo Fisher Scientific) containing 1% P/S, 0.25% bovine serum albumin (BSA), and 1× GlutaMAX<sup>TM</sup>-I. and cells were used either in time-lapse or fluorescence experiments.

## **Time lapse experiments and fluorescence analysis of mCherry-fused TGF $\alpha$ or neuregulin in the culture medium of HEK293T**

Transfected HEK293T cells were plated in 35 mm high  $\mu$ -dishes (Ibidi, Munich, Germany). Cells were treated with EOF2 or inhibitors, as described in the results and figure legends. Time-lapse assays were performed with a Zeiss Axio Observer.Z1-Inverted Microscope, using a plan-apochromat 40x/0.95 Korr M27 air objective lens. Images of transfected cells were obtained every 1 min. Captured images were processed using ZEN lite software and the efficiency of NRG1 and TGF $\alpha$  cleavage determined by analyzing the mCherry/GFP fluorescence intensity over the entire cell areas. The mCherry/GFP ratios were calculated and normalized to the average ratio measured before stimulation with ER272 using the Microsoft Excel software. Ratiometric images were built using ImageJ software, after background subtraction, the mCherry/GFP image was calculated dividing mCherry channel by the GFP channel. For each pixel, a pseudocolor scale is used for coding the ratio.

## **Morris water maze (MWM)**

Spatial memory and learning tasks were analyzed starting 10 days before sacrifice using the MWM test in control and treated mice as previously described [13] and shown in figure legend. Briefly, the maze consisted of a circular tank of water ( $\varnothing = 0.95$  m). Four equal virtual quadrants were indicated by geometric cues mounted on the walls. The hidden escape platform was located 2–3 cm below the white-coloured water surface. Water temperature was  $21 \pm 1$  °C. A camera attached to a computer and Smart software (Panlab, Spain) was located above the maze. The testing consisted in an acquisition phase followed by a retention phase. Acquisition consisted of four trials per day during 4 days. During this phase the platform, located in quadrant 2 was submerged. Time was limited to 60 s/trial with intervals of 10 min between trials. If the animal did not find the platform, it was placed on it for 10 s. Two retention tests were performed 24 h (retention 1) and 72 h (retention 2) after finishing the acquisition phase. During these tests, the platform was removed and mice were allowed to swim for 60s. The time spent in the quadrant where the platform was previously located (quadrant 2) was recorded using SMART system (Panlab, Spain). Swimming speed was also quantified to detect any motor activity dysfunction that could bias the learning and memory assessment.

## **Motor activity and new object discrimination (NOD) task**

Motor activity was analyzed measuring the distance travelled by each mice during a 30 s period before initiating the NOD test. Then integrated episodic memory for the paradigms “what”, “when” and “where” was analyzed as described in previous reports [13]. One day after finishing the MWM task, locomotor activity was analyzed in all animal groups. We measured the distance travelled by the mice for 30 min in a transparent rectangular box (22-cm long  $\times$  44-cm width  $\times$  40-cm high) using SMART system (Panlab, Spain). In addition, in order to assess any anxiety-like behavior, distance travelled was analyzed in the proximity of the walls, as well as in the center of the boxes (10 cm from the border). One day after actimetry, mice continued with the NOD test to

analyze episodic memory. The second day, mice were exposed to two objects, for habituation purposes, not used again during the object exploration task on day 3. On day 3 each mouse received two sample trials and a test trial. On the first sample trial, mice were placed into the center of the box containing three copies of a novel object (blue balls) arranged in a triangle-shaped spatial configuration and allowed to explore them for 5 min. After a delay of 30 min, the mice received a second sample trial with four novel objects (red cones), arranged in a quadratic-shaped spatial configuration, for 5 min. After a delay of 30 min, the mice received a test trial with two copies of the object from sample trial 2 (recent objects) placed in the same position and two copies of the object from sample trial 1 (familiar objects): one of them in the same position (familiar non-displaced object) and the other one in a new position (familiar displaced object). Integrated episodic memory for “what,” “where,” and “when” was analyzed: “What” was defined as the difference in time exploring familiar and recent objects, “where” was defined as the difference in time exploring displaced and non-displaced objects, and “when” was defined as the difference between time exploring familiar non-displaced and recent non-displaced objects. Motor function was also analyzed in the rotarod (Panlab, Spain). Briefly, mice were placed in the rotarod facing away the experimenter. The rod accelerated from 0 to 30 rpm over 3 min and final revolutions per minute for each mice were recorded.

### **Statistical analysis**

The data and statistical analysis comply with the recommendations on experimental design and analysis in pharmacology [14]. Statistical analysis was performed using the computer program IBM SPSS Statistics 22. Unless otherwise indicated, normal distribution of the data was first analyzed using a Shapiro-Wilks test. Then, a Brown Forsythe test was performed to test the equality of variances. Afterwards, when more than one treatment group were compared, statistical analyses were performed using one-way ANOVA followed by a post-hoc Bonferroni’s test unless otherwise indicated. Two way-ANOVA (group x day) was used in the que acquisition phase of the MWM. A Student’s *t* test was used when only one treatment group was compared with the control. Differences were considered significant at values of  $p < 0.05$ . In general, sample size used in statistical analysis were  $n=6-10$  for *in vivo* experiments and  $n = 5-9$  for *in vitro* experiments. Sample sizes were chosen based on previous works related to this one [8,11,12,15].

- 1 Geribaldi-Doldan N, Flores-Giubi E, Murillo-Carretero M, Garcia-Bernal F, Carrasco M, Macias-Sanchez AJ, et al. 12-Deoxyphorbols Promote Adult Neurogenesis by Inducing Neural Progenitor Cell Proliferation via PKC Activation. *Int J Neuropsychopharmacol.* 2015;19(1).
- 2 Schmidt RJ, Evans FJ. The succulent Euphorbias of Nigeria. II. aliphatic diterpene esters of the latices of *E. poisonii* Pax. and *E. unispina* N.E. *Br. Lloydia.* 1977;40(3):225-9.
- 3 Kilkenny C, Browne W, Cuthill IC, Emerson M, Altman DG, Group NCRRGW. Animal research: reporting in vivo experiments: the ARRIVE guidelines. *Br J Pharmacol.* 2010;160(7):1577-9.
- 4 McGrath JC, Drummond GB, McLachlan EM, Kilkenny C, Wainwright CL. Guidelines for reporting experiments involving animals: the ARRIVE guidelines. *Br J Pharmacol.* 2010;160(7):1573-6.
- 5 Thorne RG, Pronk GJ, Padmanabhan V, Frey WH, 2nd. Delivery of insulin-like growth factor-I to the rat brain and spinal cord along olfactory and trigeminal pathways following intranasal administration. *Neuroscience.* 2004;127(2):481-96.
- 6 Francis GJ, Martinez JA, Liu WQ, Xu K, Ayer A, Fine J, et al. Intranasal insulin prevents cognitive decline, cerebral atrophy and white matter changes in murine type I diabetic encephalopathy. *Brain.* 2008;131(Pt 12):3311-34.
- 7 Marks DR, Tucker K, Cavallin MA, Mast TG, Fadool DA. Awake intranasal insulin delivery modifies protein complexes and alters memory, anxiety, and olfactory behaviors. *J Neurosci.* 2009;29(20):6734-51.
- 8 Murillo-Carretero M, Geribaldi-Doldan N, Flores-Giubi E, Garcia-Bernal F, Navarro-Quiroz EA, Carrasco M, et al. ELAC (3,12-di-O-acetyl-8-O-tigloilingol), a plant-derived lathyrane diterpene, induces subventricular zone neural progenitor cell proliferation through PKCbeta activation. *Br J Pharmacol.* 2017;174(14):2373-92.
- 9 Garcia-Bernal F, Geribaldi-Doldan N, Dominguez-Garcia S, Carrasco M, Murillo-Carretero M, Delgado-Ariza A, et al. Protein Kinase C Inhibition Mediates Neuroblast Enrichment in Mechanical Brain Injuries. *Front Cell Neurosci.* 2018;12:462.
- 10 Rabaneda LG, Carrasco M, Lopez-Toledano MA, Murillo-Carretero M, Ruiz FA, Estrada C, et al. Homocysteine inhibits proliferation of neuronal precursors in the mouse adult brain by impairing the basic fibroblast growth factor signaling cascade and reducing extracellular regulated kinase 1/2-dependent cyclin E expression. *FASEB J.* 2008;22(11):3823-35.
- 11 Rabaneda LG, Geribaldi-Doldan N, Murillo-Carretero M, Carrasco M, Martinez-Salas JM, Verastegui C, et al. Altered regulation of the Spry2/Dyrk1A/PP2A triad by homocysteine impairs neural progenitor cell proliferation. *Biochim Biophys Acta.* 2016;1863(12):3015-26.
- 12 Geribaldi-Doldan N, Carrasco M, Murillo-Carretero M, Dominguez-Garcia S, Garcia-Cozar FJ, Munoz-Miranda JP, et al. Specific inhibition of ADAM17/TACE promotes neurogenesis in the injured motor cortex. *Cell Death Dis.* 2018;9(9):862.
- 13 Ramos-Rodriguez JJ, Ortiz O, Jimenez-Palomares M, Kay KR, Berrocoso E, Murillo-Carretero MI, et al. Differential central pathology and cognitive impairment in pre-diabetic and diabetic mice. *Psychoneuroendocrinology.* 2013;38(11):2462-75.
- 14 Curtis MJ, Abernethy DR. Revision of instructions to authors for pharmacology research and perspectives: enhancing the quality and transparency of published work. *Pharmacol Res Perspect.* 2015;3(2).
- 15 Carrasco M, Rabaneda LG, Murillo-Carretero M, Ortega-Martinez S, Martinez-Chantar ML, Woodhoo A, et al. Glycine N-methyltransferase expression in the hippocampus and its role in neurogenesis and cognitive performance. *Hippocampus.* 2014;24(7):840-52.

## Primary and Secondary Antibody Tables

| Antibody                   | Host                   | Isotype    | Dilution | Epitope retrieval                      | Staining pattern | Source                                | Reference |
|----------------------------|------------------------|------------|----------|----------------------------------------|------------------|---------------------------------------|-----------|
| Anti-BrdU                  | mouse                  | monoclonal | 1:100    | BrdU, proliferation marker             | nuclear          | Dako (Hamburg, Germany)               | Z0334     |
| Anti-BrdU                  | rat                    | monoclonal | 1:200    | BrdU, proliferation marker             | nuclear          | Abcam (Cambridge, UK)                 | AB6326    |
| Anti-ASCL1                 | mouse                  | monoclonal | 1:50     | ASCL1                                  | nuclear          | BD Pharmigen (San Jose, CA, USA)      | 556604    |
| Anti-DCX                   | rabbit                 | polyclonal | 1:500    | DCX, neuroblast marker                 | cytoplasmic      | Abcam (Cambridge, UK).                | ab6142    |
| Anti-EGFR                  | sheep                  | polyclonal | 1:200    | EGFR, epidermic growth factor receptor | cytoplasmic      | Merk Millipore (Billerica, Ma, USA)   | 06-847    |
| Anti-GFAP                  | mouse                  | polyclonal | 1:200    | GFAP, glial marker                     | cytoplasmic      | Cell Signaling (Beverly, MA, USA)     | 3670      |
| Anti-GFAP                  | rabbit                 | polyclonal | 1:3000   | GFAP, glial marker                     | cytoplasmic      | Dako (Hamburg, Germany)               | Z0334     |
| Anti-NeuN                  | mouse                  | monoclonal | 1:500    | NeuN, mature neurons                   | nuclear          | Abcam (Cambridge, UK)                 | ab104225  |
| Anti- $\beta$ -III-tubulin | mouse                  | monoclonal | 1:1000   | $\beta$ -III-tubulin, neuronal marker  | cytoplasmic      | StemCell Technology (Boston, MA, USA) | 60052     |
| Alexa Fluor 700 Anti-Ki67  | Mouse, clone B56 (ROU) | monoclonal | 1:200    | Ki67, proliferation marker             | nuclear          | BD Bioscience                         | 561277    |
| Anti-S100 $\beta$          | rabbit                 | polyclonal | 1:500    | S-100 $\beta$ , astrocyte marker       | cytoplasmic      | Abcam (Cambridge, UK)                 | ab41548   |

**Supplementary table 1 (Primary antibodies):** List of primary antibodies used in the study. Specifying host, isotype, dilution used, epitope retrieval, staining pattern, source and reference.

| Antibody                | Host   | Dilution | Fluorescence | Source                         | Reference |
|-------------------------|--------|----------|--------------|--------------------------------|-----------|
| Alexa Flour-anti-mouse  | donkey | 1:1000   | 488          | Invitrogen (Carlsbad, CA, USA) | A-21206   |
| Alexa Flour-anti-mouse  | donkey | 1:1000   | 594          | Invitrogen (Carlsbad, CA, USA) | A-21203   |
| Alexa Flour-anti-mouse  | goat   | 1:1000   | 405          | Invitrogen (Carlsbad, CA, USA) | A-31553   |
| Alexa Flour-anti-rat    | donkey | 1:1000   | 594          | Invitrogen (Carlsbad, CA, USA) | A-11007   |
| Alexa Flour-anti-rat    | donkey | 1:1000   | 488          | Invitrogen (Carlsbad, CA, USA) | A-21208   |
| Alexa Flour-anti-goat   | donkey | 1:1000   | 594          | Invitrogen (Carlsbad, CA, USA) | A-11058   |
| Alexa Flour-anti-mouse  | goat   | 1:1000   | 546          | Invitrogen (Carlsbad, CA, USA) | A-21123   |
| Alexa Fluor-anti-rabbit | donkey | 1:1000   | 594          | Invitrogen (Carlsbad, CA, USA) | A-21207   |

**Supplementary table 2 (Secondary antibodies):** List of secondary antibodies used in the study. Specifying host, dilution used, fluorescence conjugated, source and reference.
